# Supplementary material for: MP0250, a VEGF and HGF neutralizing DARPin® molecule shows high anti-tumor efficacy in mouse xenograft and patient-derived tumor models
Source: PubMed Central journal article supplement (PMC5716736; doi:10.18632/oncotarget.21738), 2017-10-11
Supplement: oncotarget-08-98371-s001.pdf [file oncotarget-08-98371-s001.pdf]

## MP0250, a VEGF and HGF neutralizing DARPin® molecule shows high anti-tumour efficacy in mouse xenograft and patient-derived tumour models

### SUPPLEMENTARY MATERIALS

**Table 1: Anti-tumor response in xenograft and syngeneic mouse models**

| Model | Type and Site of implantation   | % T/C (tumor volume)<br>p-values versus vehicle                                                                                                                                           | Comparison groups                                                                                                                                              |
|-------|---------------------------------|-------------------------------------------------------------------------------------------------------------------------------------------------------------------------------------------|----------------------------------------------------------------------------------------------------------------------------------------------------------------|
| A673  | xenograft<br>subcutaneous       | MP0250: 35.5% ( $p = 0.0139$ )<br>Anti-HGF: 89.8% ( $p = 0.144$ )<br>Anti-VEGF: 24.2% ( $p = 0.027$ )                                                                                     |                                                                                                                                                                |
| U87MG | xenograft<br>subcutaneous       | MP0250: 5.3% ( $p = 0.0144$ )<br>Anti-HGF: 5.2% ( $p = 0.075$ )<br>Anti-VEGF: 34.1% ( $p = 0.0143$ )                                                                                      |                                                                                                                                                                |
| Renca | syngeneic<br>Orthtopic (kidney) | MP0250 (4 mg/kg): 10.6% ( $p = 0.0085$ )<br>MP0250 (40 mg/kg): 7.2% ( $p = 0.0081$ )<br>Sorafenib: 83.95% ( $p = 0.61$ )                                                                  |                                                                                                                                                                |
| KP4   | xenograft<br>subcutaneous       | MP0250: 51.7% ( $p = 0.0023$ )<br>Gemcitabine: 50.5% ( $p = 0.0006$ )<br>MP0250 plus Gemcitabine: 23% ( $p < 0.0001$ )                                                                    |                                                                                                                                                                |
| MC38  | syngeneic<br>subcutaneous       | MP0250: 30.6% ( $p = 0.0001$ )<br>Anti-HGF: 78.1 % ( $p = 0.32$ )<br>Anti-VEGF: 48.1 % ( $p = 0.056$ )<br>RMP1-14: 64.9 % ( $p = 0.048$ )<br>MP0250 plus RMP1-14: 18.8 % ( $p < 0.0001$ ) | MP0250 vs. Anti-HGF $p = 0.021$<br>MP0250 vs Anti-VEGF $p = 0.028$<br>MP0250 vs MP0250 plus RMP-1<br>$p = 0.053$ (tumor volume); $p = 0.049$<br>(tumor weight) |

**Table 2: Anti-tumor response in PDX models in correlation with HGF and VEGF expression**

| <b>Model</b> | <b>Tumor entity</b>                           | <b>HGF-expression<br/>(Affimetrix)</b> | <b>VEGFA-expression<br/>(Affimetrix)</b> | <b>% T/C<br/>MP0250<br/>(day)</b> | <b>% T/C<br/>SoC<br/>(day)</b> | <b>% T/C<br/>MP0250<br/>plus SoC</b> |
|--------------|-----------------------------------------------|----------------------------------------|------------------------------------------|-----------------------------------|--------------------------------|--------------------------------------|
| LIXF 658     | Liver<br>Adeno carcinoma                      | high                                   | High                                     | 6.9% (45)                         | 14.1% (31)                     | n.a.                                 |
| LIXF 575     | Liver<br>Hepatocellular carcinoma             | low                                    | High                                     | 37.4% (17)                        | 49.1% (17)                     | n.a.                                 |
| LXFL 1121    | Lung<br>Large cell                            | high                                   | High                                     | 26.2% (34)                        | 87.8% (7)                      | n.a.                                 |
| LXFS 650     | Lung (Metastasis Lymph<br>Node)<br>Small cell | moderate                               | High                                     | 88.7% (24)                        | 78.2% (7)                      | n.a.                                 |
| RXF 616      | Kidney (Metastasis Lung)<br>Hypernephroma     | high                                   | High                                     | 56.4% (13)                        | 79.1% (9)                      | n.a.                                 |
| RXF 2264     | Kidney                                        | high                                   | High                                     | 8.9% (25)                         | 24.0% (25)                     | n.a.                                 |
| GXA 3002     | Stomach (Asian)                               | low                                    | High                                     | 31.7% (26)                        | 46.1% (20)                     | 16.7% (26)                           |
| GXA 3027     | Stomach (Asian)                               | low                                    | High                                     | 22.2% (24)                        | 15.8% (24)                     | 0% (24)                              |

Tumor inhibition for a particular day (T/C in %) was calculated from the ratio of the median RTV values of test versus control groups multiplied by 100%. The table summarizes the efficacy of the individual treatments (% T/C) and the expression of VEGF and HGF as determined by Affymetix mRNA expression profiling. Expression data were provided by Oncotest/CRL
